# Supplementary material
Source: PubMed Central journal article supplement (PMC7678416)

**Tabla suplementaria 1.** COVID-19 pacientes con PCR+ en Alcorcón (España). Incidencia en Alcorcón según países representativos (febrero-abril 2020)

|                                                        |           | Europa    |           |           | Asia      | África del Norte | América Latina |            |             |
|--------------------------------------------------------|-----------|-----------|-----------|-----------|-----------|------------------|----------------|------------|-------------|
|                                                        | Todos     | España    | Rumanía   | Ucrania   | China     | Marruecos        | Venezuela      | Colombia   | Perú        |
| <b>Casos (n)</b>                                       | 943       | 856       | 7         | 7         | 2         | 6                | 8              | 19         | 38          |
| <b>Edad (mediana)</b>                                  | 72,0      | 73,0      | 42,0      | 58,0      | 46,0      | 70,5             | 55,0           | 46,0       | 52,0        |
| Rango intercuartílico                                  | 59-79     | 62-80     | 38-55     | 57-62     | 44-48     | 44,7-75          | 53-67          | 38-52      | 38-58       |
| <b>Hombres (%)</b>                                     | 55,0      | 58,6      | 57,1      | 0,0       | 50,0      | 66,7             | 62,5           | 47,4       | 47,0        |
| <b>Incidencia acumulada</b>                            | 6,54      | 6,08      | 1,51      | 3,75      | 2,30      | 3,18             | 7,94           | 16,13      | 36,05       |
| Intervalo de confianza al 95%, distribución de Poisson | 6,13-6,98 | 6,08-6,96 | 0,61-3,10 | 1,51-7,73 | 0,28-8,31 | 1,17-6,93        | 3,43-15,65     | 9,71-25,19 | 25,51-49,49 |

**Figura suplementaria 1.** Distribución por grupos de edad de los españoles y migrantes residentes en Alcorcón

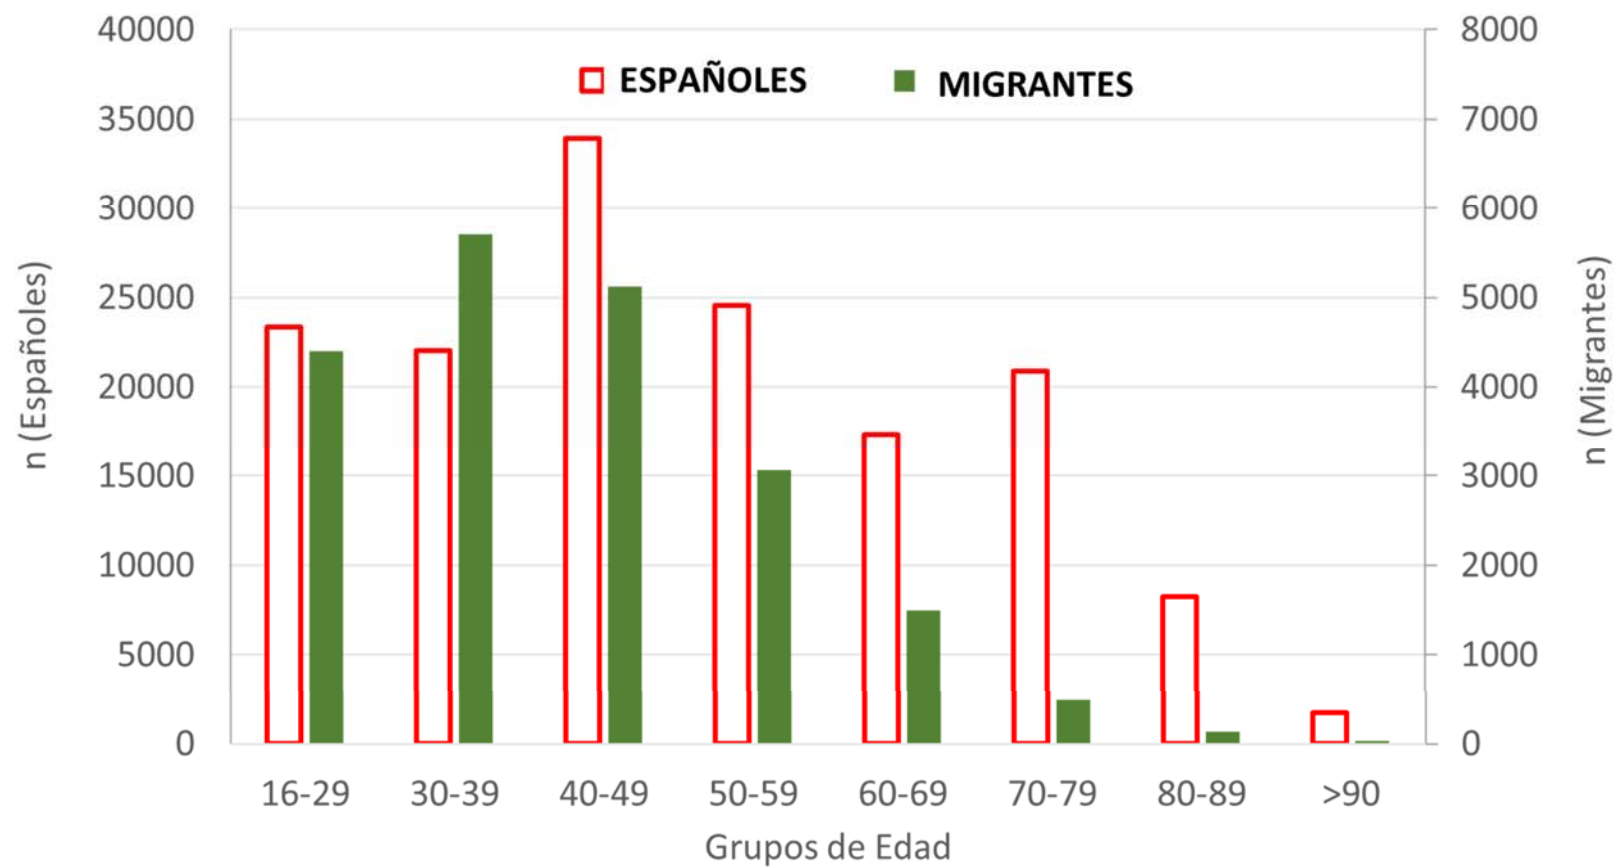

**Figura suplementaria 2.** Pirámides de población de diferentes regiones del mundo entre los residentes en Alcorcón

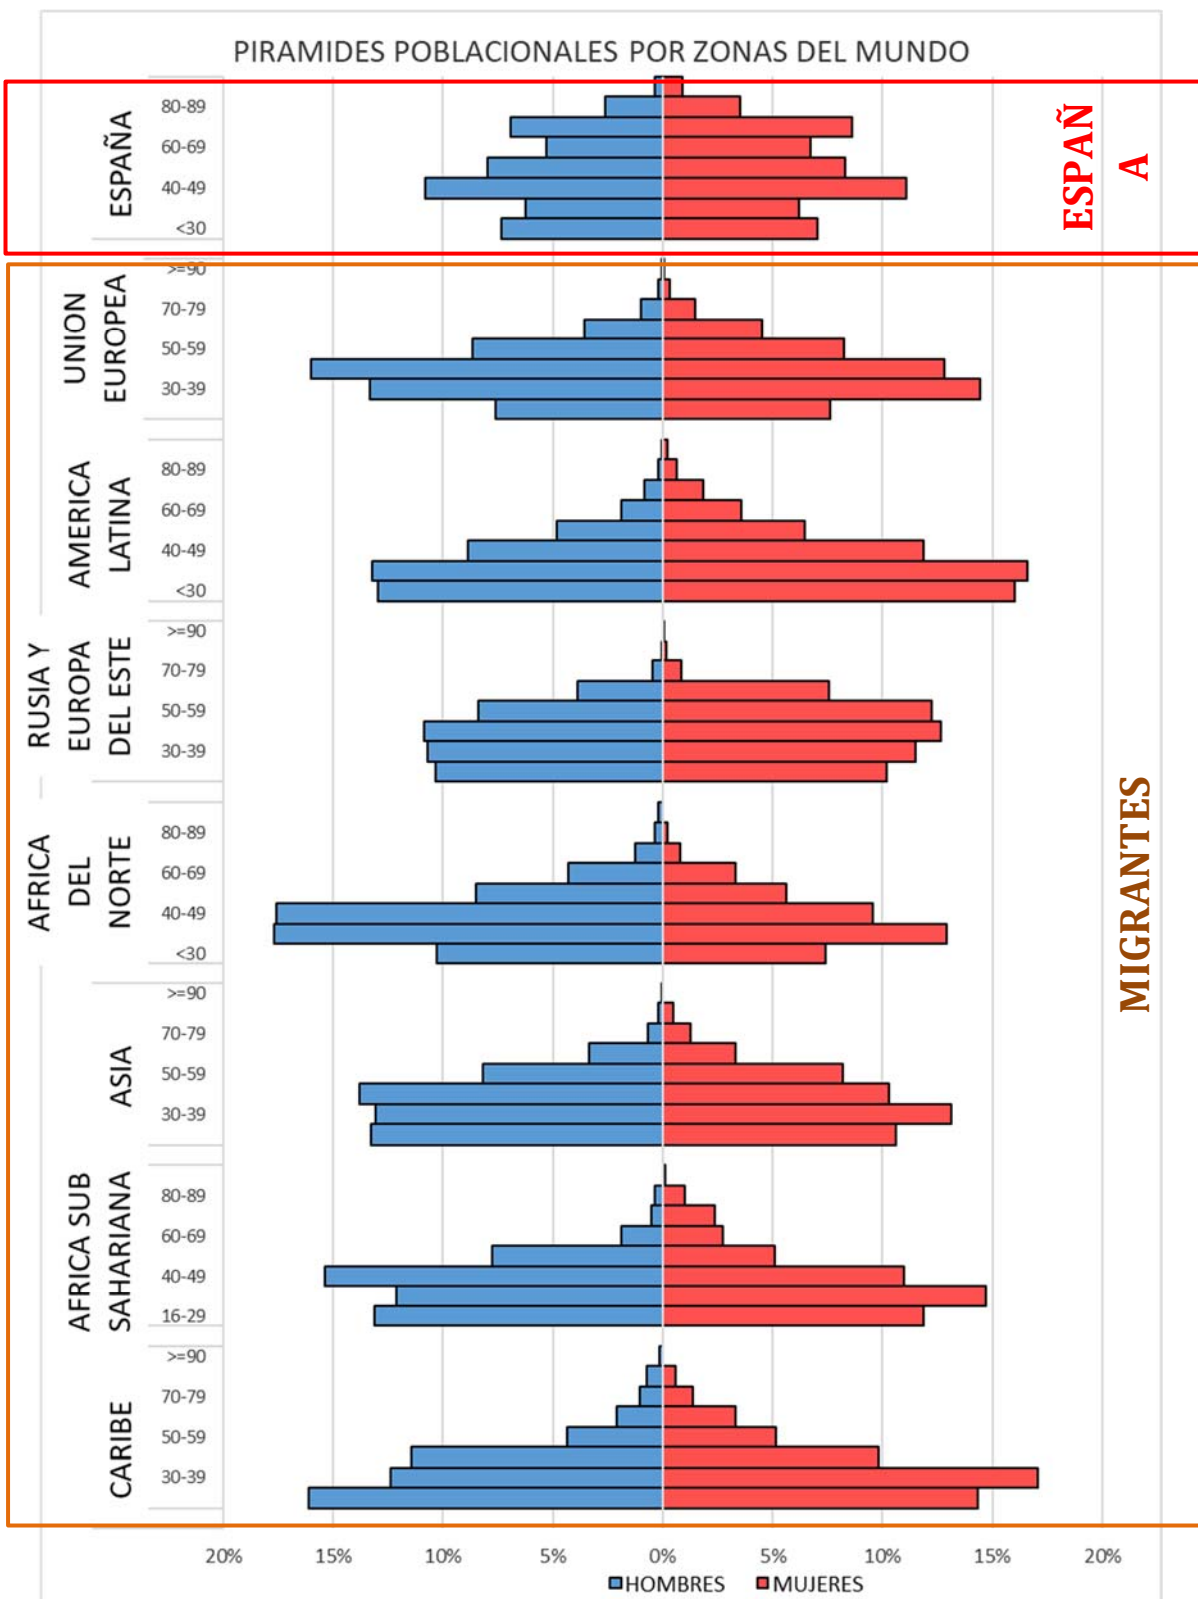

**Figura suplementaria 3.** Distribución de grupos de edad de la población mundial y casos COVID-19 entre todos los residentes en Alcorcón (panel superior), españoles (panel medio) y migrantes (panel inferior)

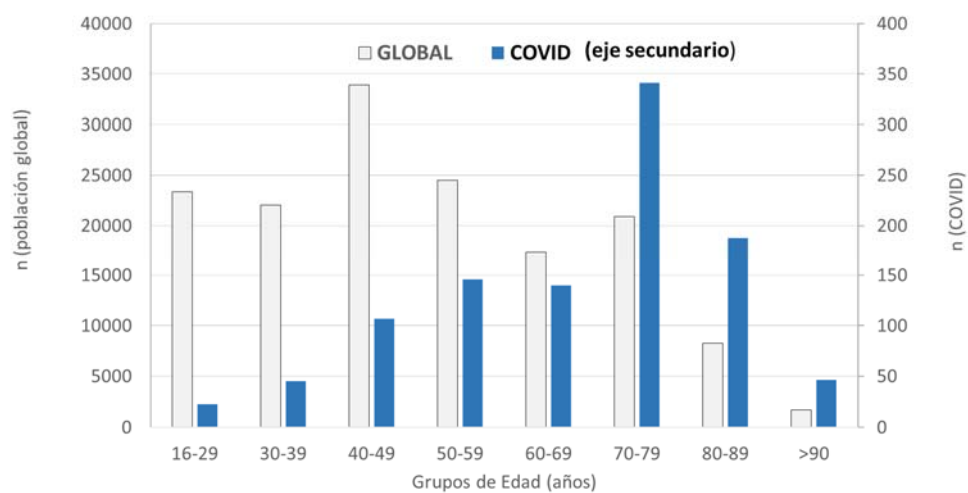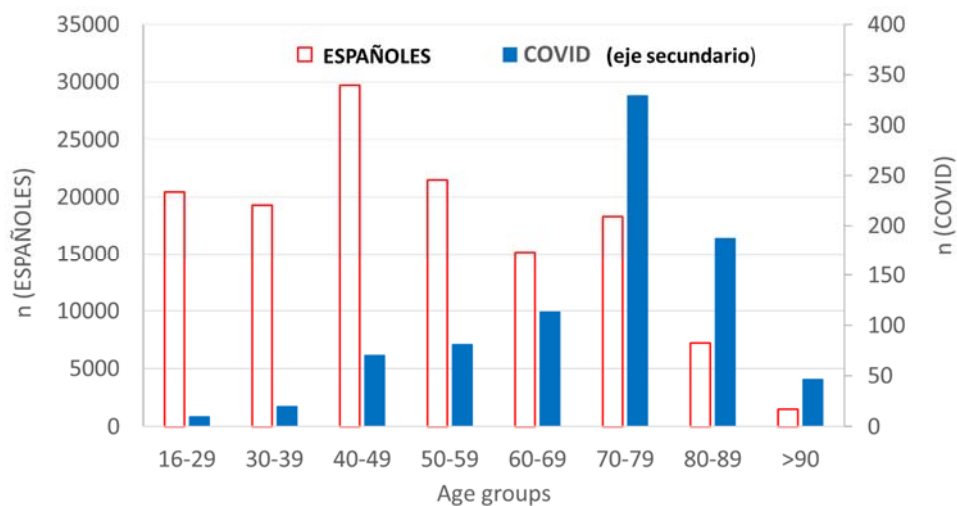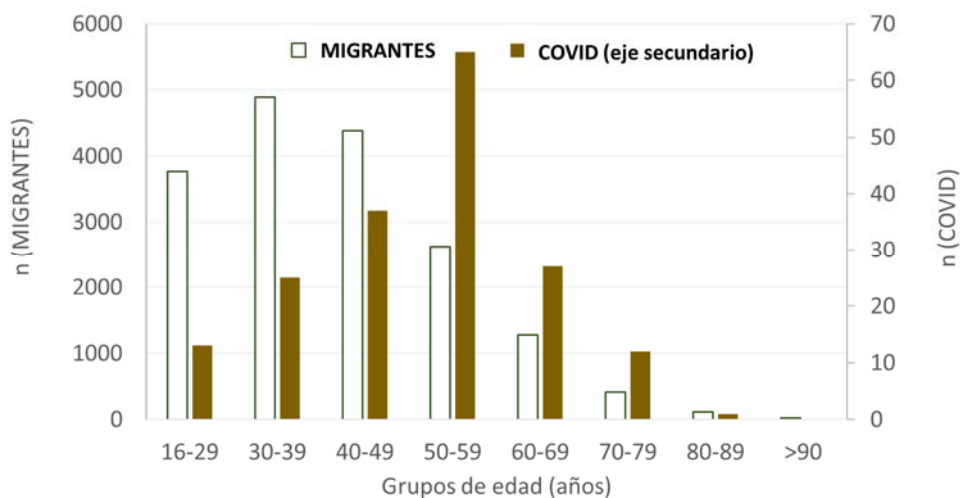

**Figura suplementaria 4.** Análisis exploratorio. Incidencia de COVID 19 confirmada por PCR (cruda y ajustada por edad y sexo) entre españoles y migrantes de diferentes países residentes en Alcorcón

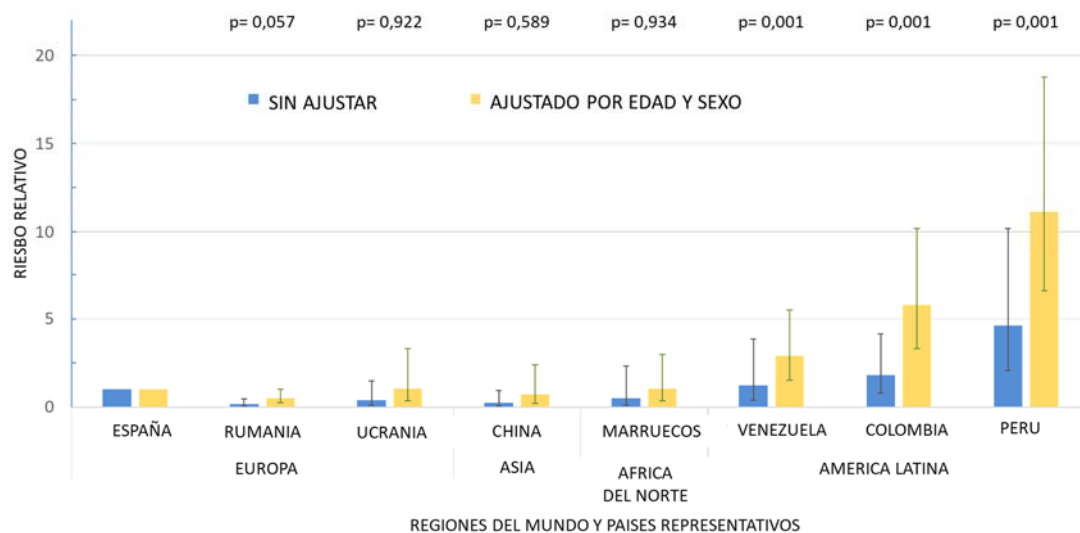

Supplement: mmc1.pdf [file mmc1.pdf]
